# Supplementary material
Source: MDPI journal article supplement (https://www.mdpi.com/1999-4907/10/3/239)

Supplementary Materials

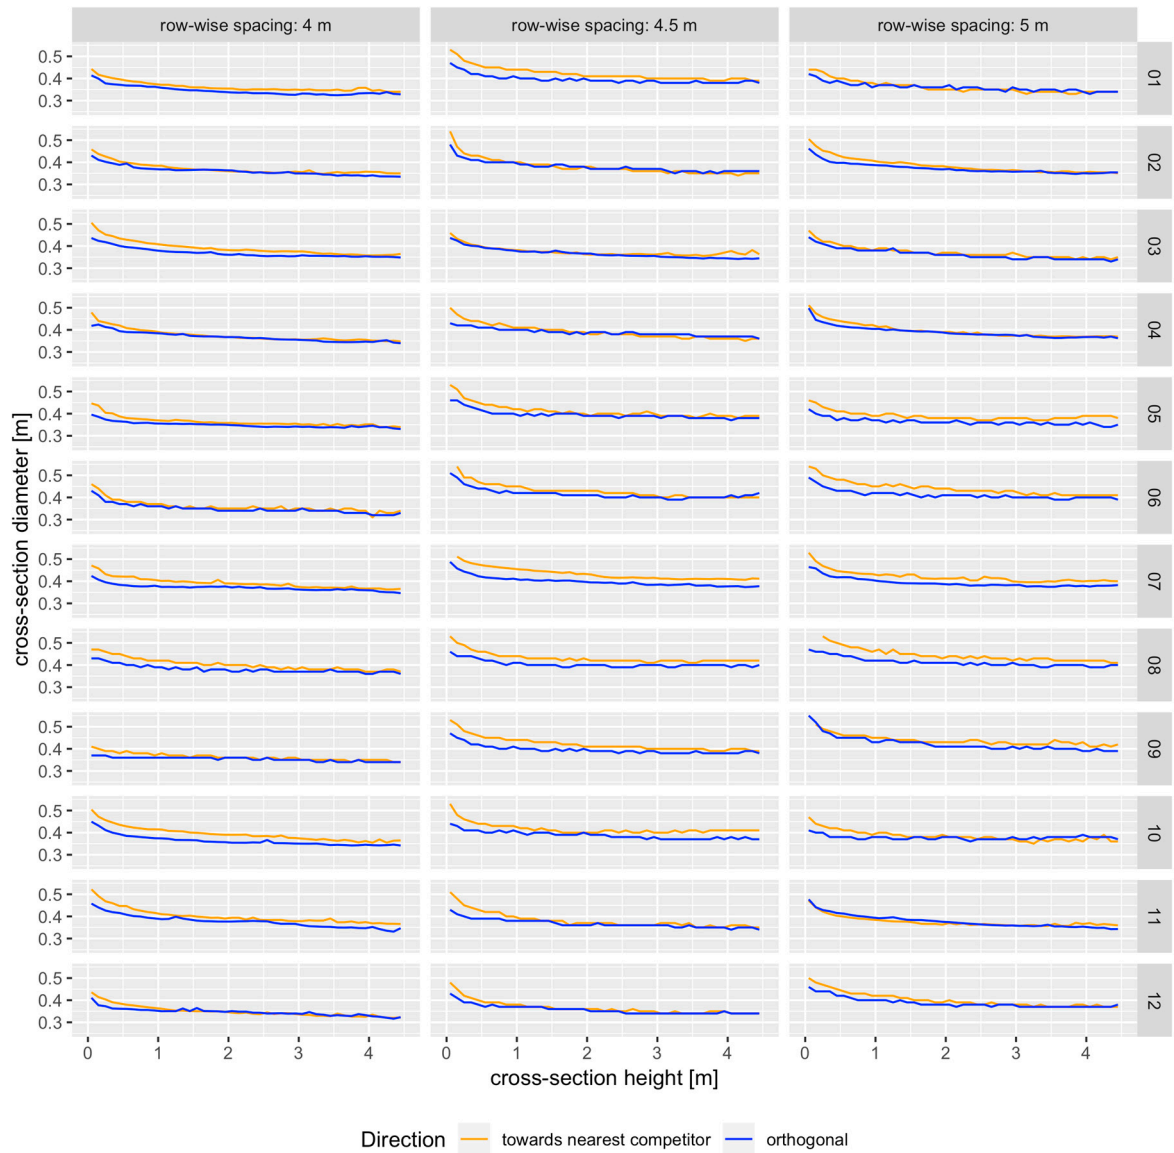

Figure S1. TLS-based profile pairs for the 36 analyzed poplars.

Supplement: s1 [file s1]
